# Supplementary material
Source: publisher figshare collection journal article supplement (https://asha.figshare.com/articles/dataset/_/23681718)
Supplement: Supplementary file 1 [file 1]

## **Supplemental Material S4. Research memo format.**

MONTH-DAY-YEAR

Transcript: [subject number]

Coder: [NAME]

Coded Through: Paste last few sentences coded here (Note add \* to indicate the end of the last sentence that you coded and indicate that you did so here).

Research Notes: Any notes you have about the coding process itself.

Thoughts on organization: Any notes you have regarding the node structure/hierarchy or suggest some organizational needs within the nodes.

Thoughts on analysis: Notes on any themes you are noticing, either within a particular transcript or across the transcripts you have been coding. This is a place to record any/all of your emerging thoughts on our data as it relates to our aims.

Research Questions to keep in mind while coding: Study 1 research questions are: What features, tools, or resources are needed to support the implementation of CAI strategies during typical classroom activities? Which components of the draft version of CAI have the highest ratings of acceptability and feasibility?, and Which components of the draft version of CAI have the lowest ratings of acceptability and feasibility?
