# Supplementary material
Source: publisher figshare collection journal article supplement (https://asha.figshare.com/articles/dataset/_/23681718)
Supplement: Supplementary file 2 [file 1]

## **Supplemental Material S3. Interview guide.**

### General Questions

1. Talk me through what you do when you find out that you have a student in your classroom who uses AAC.
2. Do you have anyone available to you in your school/school district who helps you with this process?
3. In the past year, tell me about an experience you had working with a student who uses AAC.
  - a. What instructional strategies or approaches were used with that student?
  - b. How was the curriculum modified to help support that student?
  - c. What resources did you find most helpful for working with that student?
4. In an ideal world in which you had access to any resources or personnel you needed, what supports would you want to help you work with your students with complex communication needs?
5. What barriers (e.g., environmental, personal, financial, institutional) do you see which inhibit AAC use in the classroom?
6. In our previous interviews, our participants have mentioned that it can be difficult to "sell" the importance of working on communication to some educators/SLPs. Is there a certain way you present AAC to people that you find is more effective at getting buy-in?

### Questions about Potential Strategies

Here we asked participants to discuss their experience using these strategies in a classroom setting.

7. Selecting Target Vocabulary (Specific words are selected to correspond with classroom routines and are included in the child's AAC system); Specific probes might include:
  - a. Tell me about your process for choosing vocabulary for a student's AAC system?
  - b. What is the process for periodically updating vocabulary in a student's system?
  - c. What are the difficulties associated with selecting vocabulary?
  - d. What needs to change about vocabulary selection to ensure there are words that are important for requesting, participating in classroom activities, having social interactions with others?
8. Naturalistic Teaching Strategies (Uses motivating activities and materials to teach language. Encourages responsive interaction style and instruction with a focus on generalization across contexts and people. Milieu or naturalistic language strategies consist of brief trials that are based on students interests and are embedded in ongoing activities to facilitate communication.)

- a. AAC Modeling
  - b. Responsiveness
  - c. Prompting Strategies
9. Systematic Instruction (Method for teaching which incorporates principles of ABA. Teachers analyze a skill into individual components and select a teaching method or prompting strategy.)
- a. Instructional Strategies
  - b. Task Analysis
  - c. Reinforcement
  - d. AAC Modeling
10. Please rank the following settings from the easiest to implement AAC strategies in to the most difficult. Can you tell me a little bit about how you chose your rankings?
- a. Shared Reading (small group)
  - b. Direct Instruction
    - i. Literacy Activities
    - ii. Math Activities
  - c. Collaborative Centers
  - d. Free-Play
  - e. Outdoor
  - f. Gross Motor Activities
11. Do you have anything else to add about integrating AAC use into the classroom?
