# Supplementary material
Source: publisher figshare collection journal article supplement (https://asha.figshare.com/articles/dataset/_/23681718)
Supplement: Supplementary file 4 [file 1]

## Supplemental Material S2. AAC use survey results.

| Question                                                                                                                                                                                                                     | <i>M</i> | <i>SD</i> | Mode | Range |
|------------------------------------------------------------------------------------------------------------------------------------------------------------------------------------------------------------------------------|----------|-----------|------|-------|
| How many times today did you or another adult prompt a child in your class to use their AAC system?                                                                                                                          | 3.11     | 1.41      | 4    | 0-4   |
| How many times today did you prompt the child to use their AAC system or ask the child a question when their AAC system was available during informal opportunities (e.g., meal times, recess, transitioning to activities)? | 2.33     | 1.33      | 1    | 0-4   |
| How many times did this child communicate at school with his/ her AAC system today?                                                                                                                                          | 3.11     | 1.32      | 4    | 0-4   |
| How many times today did you use the AAC system to communicate to the child (either to start talking or to respond to the child's communication attempts)?                                                                   | 3.00     | 1.33      | 4    | 0-4   |
| How many different school staff used the child's AAC system while communicating with the child today?                                                                                                                        | 1.78     | 0.94      | 1    | 1-4   |
| How many different school staff used the child's AAC system while communicating with the child today?                                                                                                                        | 0.17     | 0.38      | 0    | 0-1   |

*Note.* Response options for the survey were: 0 (0), 1 (1 or 2), 2 (3 or 4), 3 (5 or 6), and 4 (7 or more) times per day.
