# Supplementary material
Source: publisher figshare collection journal article supplement (https://asha.figshare.com/articles/dataset/_/23681718)
Supplement: Supplementary file 5 [file 1]

## **Supplemental Material S5.** Member checking survey.

# Classroom AAC Member Checking Survey

Hello,

Thank you for participating in an interview regarding classroom AAC supports. Now, we invite you to provide feedback on a few quotes and our preliminary themes for us to see how well they match your experience.

Thank you!

---

Theme: [memchec\_theme1]

Quote: [memchec\_quote1]

---

Does this quote still ring true to your experience?

☐ Yes

☐ No

---

You can use this space to correct, or add to your statement.

Please share any comments you have about your quote (ex: How it relates to or differs from the theme).

---

Theme: [memchec\_theme2]

Quote: [memchec\_quote2]

---

Does this quote still ring true to your experience?

☐ Yes

☐ No

---

You can use this space to correct, or add to your statement.

Please share any comments you have about your quote (ex: How it relates to or differs from the theme).

---

Theme: [memchec\_theme3]

Quote: [memchec\_quote3]

---

Does this quote still ring true to your experience?

☐ Yes

☐ No

---

You can use this space to correct, or add to your statement.

Please share any comments you have about your quote (ex: How it relates to or differs from the theme).

**Please read through the following and share your thoughts and opinions on each theme.**

General Experiences: Difficulty knowing where to start- Many professionals communicated difficulty in knowing where to start in implementing AAC, especially in areas with lower baseline AAC knowledge.

Does this reflect your experience?

- ☐ Yes  
☐ No

Please explain how your experience differs:

General Experiences: Generating buy in through demonstration of success: Many professionals indicated that other staff members often need to see how a strategy could work for their student or how it could make their job easier in order to generate buy in.

Does this reflect your experience?

- ☐ Yes  
☐ No

Please explain how your experience differs:

Facilitators to AAC Use in the Classroom: Collaborative teams- Good relationships, shared goals, and trust between stakeholders are important for success.

Does this reflect your experience?

- ☐ Yes  
☐ No

Please explain how your experience differs:

Barriers to AAC Use in the Classroom: Challenging student behavior- Aggressive behavior, self-injurious behavior, off-task behavior etc.

Does this reflect your experience?

- ☐ Yes  
☐ No

Please explain how your experience differs:

---

Barriers to AAC Use in the Classroom: Complexity of AAC systems- AAC as complex and not intuitive to learn, compounded by the need to learn multiple different systems to support different students.

---

Does this reflect your experience?

- ☐ Yes  
☐ No
- 

Please explain how your experience differs:

---

Barriers to AAC Use in the Classroom: Disagreement between stakeholders- Professionals and/or parents not agreeing with the plan to implement AAC

---

Does this reflect your experience?

- ☐ Yes  
☐ No
- 

Please explain how your experience differs:

---

Is there anything else you would like to add about your experience with AAC implementation in the classroom?

---

---

Thank you for your time!
